# Supplementary material for: Surgical Outcomes and Trends for Chronic Pancreatitis: An Observational Cohort Study from a High-Volume Centre
Source: MDPI journal article supplement (doi:10.3390/jcm11082105), 2022-04-09
Supplement: s1 [file s1]

**Table S1.** Non-surgical data before and after surgery for the entire cohort.

|                                                       | Prior to surgery<br><i>n</i> = 162 | 6 months after surgery<br><i>n</i> =162 | <i>p</i> value <sup>a,b,c</sup> | Missing cases ( <i>n</i> ) |
|-------------------------------------------------------|------------------------------------|-----------------------------------------|---------------------------------|----------------------------|
| PEI, <i>n</i> (%)                                     | 70 (45)                            | 142 (90)                                | <b>&lt; 0.001</b>               | 5                          |
| PERT dosage in lipase units, median (IQR)             | 0 (0 – 150 000)                    | 150 000 (84 000 – 225 000)              | <b>&lt; 0.001</b>               | 26                         |
| BMI in kg/m <sup>2</sup> median (IQR) and mean (± SD) | 23.5 (20.9 – 28.1)                 | 22.7 (19.4 – 25.7)                      | <b>&lt; 0.001</b>               | 48                         |
| Stool consistency, <i>n</i> (%)                       |                                    |                                         | 0.889                           | 44                         |
| Constipation                                          | 6 (5)                              | 7 (6)                                   |                                 |                            |
| Normal                                                | 86 (73)                            | 85 (72)                                 |                                 |                            |
| Diarrhoea                                             | 26 (22)                            | 26 (22)                                 |                                 |                            |
| DM, <i>n</i> (%)                                      | 48 (31)                            | 77 (50)                                 | <b>&lt; 0.001</b>               | 9                          |
| Pain treatment, <i>n</i> (%)                          |                                    |                                         |                                 |                            |
| Acetaminophen                                         | 60 (44)                            | 61 (45)                                 | 1.000                           | 26                         |
| NSAID                                                 | 17 (12)                            | 9 (7)                                   | 0.115                           | 26                         |
| Opioid                                                | 54 (40)                            | 42 (31)                                 | 0.058                           | 26                         |
| Opioid dosage in mg, median (IQR)                     | 0 (0 – 36)                         | 0 (0 – 10)                              | 0.060                           | 34                         |
| Pain intensity, <i>n</i> (%)                          |                                    |                                         | <b>&lt; 0.001</b>               | 41                         |
| No pain                                               | 52 (43)                            | 79 (65)                                 |                                 |                            |
| Mild/moderate pain                                    | 38 (31)                            | 30 (25)                                 |                                 |                            |
| Severe pain                                           | 31 (26)                            | 12 (10)                                 |                                 |                            |

<sup>a</sup> Comparison between prior to surgery and 6 months after surgery for entire cohort.

<sup>b</sup> *p* values were calculated using McNemar's test for categorical variables and Wilcoxon signed – rank test for non-normally distributed variables and ordinal data.

<sup>c</sup> Bold values denote statistical significance (*p* < 0.05).

PEI: Pancreatic exocrine insufficiency; PERT: Pancreatic enzyme replacement therapy; IQR: Interquartile range; BMI: Body mass index; DM: Diabetes Mellitus; NSAID: Non-steroidal anti-inflammatory drug; DPPHR: Duodenum-preserving pancreatic head resection; PD: Pancreaticoduodenectomy.
